# Supplementary material
Source: publisher figshare collection journal article supplement (https://asha.figshare.com/articles/dataset/_/9932279)
Supplement: Supplementary file 1 [file 1]

**Supplemental Material S2.** Generalized estimating equation (GEE) analyses predicting adolescent outcomes from school-age measures.

| Measure             | Predictor        | $\beta$ | $b$ (SE) | $\chi^2$ | Overall $p$ -value | Overall $R^2$ |
|---------------------|------------------|---------|----------|----------|--------------------|---------------|
| GFTA                | Intercept        | 1.66    | 0.19     |          |                    |               |
|                     | <b>SSD Group</b> |         |          | 48.8     | < .001***          | 0.269         |
|                     | No SSD           | REF     | REF      |          |                    |               |
|                     | Resolved SSD     | −0.91   | 0.26     |          |                    |               |
|                     | Low MSW          | −1.40   | 0.39     |          |                    |               |
|                     | PSD + Low MSW    | −2.27   | 0.37     |          |                    |               |
| PPVT                | Intercept        | 111.8   | 2.4      |          |                    |               |
|                     | <b>SSD Group</b> |         |          | 44.0     | < .001***          | 0.271         |
|                     | No SSD           | REF     | REF      |          |                    |               |
|                     | Resolved SSD     | −2.5    | 3.3      |          |                    |               |
|                     | Low MSW          | −16.7   | 5.0      |          |                    |               |
|                     | PSD + Low MSW    | −21.7   | 4.2      |          |                    |               |
| EOWPVT-3            | Intercept        | 125.3   | 2.3      |          |                    |               |
|                     | <b>SSD Group</b> |         |          | 57.8     | < .001***          | 0.280         |
|                     | No SSD           | REF     | REF      |          |                    |               |
|                     | Resolved SSD     | −5.2    | 3.1      |          |                    |               |
|                     | Low MSW          | −21.5   | 4.8      |          |                    |               |
|                     | PSD + Low MSW    | −19.8   | 4.0      |          |                    |               |
| Motor Speech Skills | Intercept        | −0.20   | 0.24     |          |                    |               |
|                     | <b>SSD Group</b> |         |          | 1.75     | .63 (NS)           | 0.004         |
|                     | No SSD           | REF     | REF      |          |                    |               |
|                     | Resolved SSD     | 0.08    | 0.33     |          |                    |               |
|                     | Low MSW          | 0.34    | 0.50     |          |                    |               |
|                     | PSD + Low MSW    | 0.16    | 0.44     |          |                    |               |
| Recalling Sentences | Intercept        | 6.03    | 1.39     |          |                    |               |
|                     | Sex              | 1.12    | 0.58     |          |                    |               |
|                     | SES              | 0.76    | 0.28     |          |                    |               |
|                     | <b>SSD Group</b> |         |          | 29.2     | < .001***          | 0.264         |
|                     | No SSD           | REF     | REF      |          |                    |               |
|                     | Resolved SSD     | −0.52   | 0.65     |          |                    |               |
|                     | Low MSW          | −3.79   | 0.95     |          |                    |               |
|                     | PSD + Low MSW    | −3.96   | 0.86     |          |                    |               |
| Word ID             | Intercept        | 93.9    | 5.3      |          |                    |               |
|                     | Sex              | 6.3     | 3.0      |          |                    |               |
|                     | <b>SSD Group</b> |         |          | 40.5     | < .001***          | 0.270         |
|                     | No SSD           | REF     | REF      |          |                    |               |
|                     | Resolved SSD     | 3.3     | 3.3      |          |                    |               |
|                     | Low MSW          | −22.0   | 5.2      |          |                    |               |

|              |                  |       |     |      |           |       |
|--------------|------------------|-------|-----|------|-----------|-------|
|              | PSD + Low MSW    | −19.7 | 4.7 |      |           |       |
| Word Attack  | Intercept        | 103.4 | 2.3 |      |           |       |
|              | <b>SSD Group</b> |       |     | 51.9 | < .001*** | 0.346 |
|              | No SSD           | REF   | REF |      |           |       |
|              | Resolved SSD     | −0.3  | 3.2 |      |           |       |
|              | Low MSW          | −30.9 | 5.0 |      |           |       |
|              | PSD + Low MSW    | −23.0 | 4.5 |      |           |       |
| <hr/>        |                  |       |     |      |           |       |
| Reading Comp | Intercept        | 101.0 | 5.3 |      |           |       |
|              | Sex              | 5.1   | 2.9 |      |           |       |
|              | <b>SSD Group</b> |       |     | 42.9 | < .001*** | 0.273 |
|              | No SSD           | REF   | REF |      |           |       |
|              | Resolved SSD     | −4.1  | 3.4 |      |           |       |
|              | Low MSW          | −22.4 | 5.0 |      |           |       |
|              | PSD + Low MSW    | −18.3 | 2.9 |      |           |       |
| <hr/>        |                  |       |     |      |           |       |
| TWS          | Intercept        | 87.4  | 5.2 |      |           |       |
|              | Sex              | 6.6   | 2.9 |      |           |       |
|              | <b>SSD Group</b> |       |     | 58.4 | < .001*** | 0.247 |
|              | No SSD           | REF   | REF |      |           |       |
|              | Resolved SSD     | −2.4  | 3.3 |      |           |       |
|              | Low MSW          | −22.2 | 5.1 |      |           |       |
|              | PSD + Low MSW    | −18.9 | 4.5 |      |           |       |

*Note.* REF = reference group;  $\chi^2$  = chi-squared (3 d.f.) statistic from analysis of variance (ANOVA) comparing models with and without outcome group; Overall  $p$  =  $p$  value corresponding to  $\chi^2$ : NS ( $p \geq .1$ ),  $*p < .1$ ,  $**p < .05$ ,  $***p < .001$ ;  $R^2$  = multiple  $R^2$  for the outcome group only. Covariates of sex and socioeconomic status were included in the model when significant.

GFTA = Goldman-Fristoe Test of Articulation; PPVT = Peabody Picture Vocabulary Test; EOWPVT-3 = Expressive One Word Picture Vocabulary Test—Third Edition; Motor Speech Skills = Fletcher Time-by-Count; Recalling Sentences = from Clinical Evaluation of Language Fundamentals (CELF) and Test of Language Development—Primary: Third Edition (TOLD-P:3) Imitating Sentences; Word Attack = subtest of the Woodcock Reading Mastery Test—Revised (WRMT-R); Word Identification = subtest of the WRMT-R; Reading Comprehension = subtest of the Wechsler Individual Achievement Test (WIAT); TWS = Test of Written Spelling.

## References

- Dunn, D. M., & Dunn, L. M. (1997). *Peabody Picture Vocabulary Test—III (PPVT-III)*. Circle Pines, MN: AGS.
- Dunn, L. M. (2006). *Peabody Picture Vocabulary Test—Fourth Edition (PPVT-4)*. Circle Pines, MN: AGS.
- Fletcher, J. (1977). *The Fletcher Time-by-Count Test of Diadochokinetic Syllable Rate*. Tigard, OR: C.C. Publications.
- Gardner, M. F. (2000). *Expressive One-Word Picture Vocabulary Test—Third Edition (EOWPVT-3)*. Novato, CA: Academic Therapy Publications.
- Goldman, R., & Fristoe, M. (1986). *Goldman-Fristoe Test of Articulation*. Circle Pines, MN: AGS.
- Goldman, R., & Fristoe, M. (2000). *Goldman-Fristoe Test of Articulation—Second Edition*. Circle Pines, MN: AGS.
- Larsen, S. C., & Hammill, D. D. (1994). *Test of Written Spelling—Third Edition (TWS-3)*. Austin, TX: Pro-Ed.
- Newcomer, P. L., & Hammill, D. D. (1997). *Test of Language Development—Primary: Third Edition (TOLD-P:3)*. Austin, TX: Pro-Ed.
- Semel, E., Wiig, E. H., & Secord, W. (1995). *Clinical Evaluation of Language Fundamentals—Third Edition (CELF-3)*. San Antonio, TX: The Psychological Corporation.
- Wechsler, D. (1992). *Wechsler Individual Achievement Test (WIAT)*. San Antonio, TX: The Psychological Corporation.
- Woodcock, R. (1987). *Woodcock Reading Mastery Test—Revised (WRMT-R)*. Circle Pines, MN: AGS.
