# Supplementary material
Source: publisher figshare collection journal article supplement (https://asha.figshare.com/articles/dataset/_/9932279)
Supplement: Supplementary file 2 [file 1]

**Supplemental Material S1.** Generalized estimating equation (GEE) analyses predicting adolescent outcomes from preschool measures.

| Measure             | Predictor        | $\beta$ | $b$ (SE) | $\chi^2$ | Overall $p$ -value | $R^2$ |
|---------------------|------------------|---------|----------|----------|--------------------|-------|
| GFTA                | Intercept        | 0.73    | 0.19     |          |                    |       |
|                     | <b>SSD Group</b> |         |          | 42.7     | < .001***          | 0.309 |
|                     | No SSD           | REF     | REF      |          |                    |       |
|                     | Resolved SSD     | -1.06   | 0.34     |          |                    |       |
|                     | Low MSW          | -1.53   | 0.33     |          |                    |       |
|                     | PSD + Low MSW    | -1.74   | 0.30     |          |                    |       |
| PPVT                | Intercept        | 110.0   | 3.1      |          |                    |       |
|                     | <b>SSD Group</b> |         |          | 16.2     | .001**             | 0.145 |
|                     | No SSD           | REF     | REF      |          |                    |       |
|                     | Resolved SSD     | -3.8    | 3.9      |          |                    |       |
|                     | Low MSW          | -6.8    | 5.3      |          |                    |       |
|                     | PSD + Low MSW    | -16.6   | 4.7      |          |                    |       |
| EOWPVT-3            | Intercept        | 115.2   | 4.0      |          |                    |       |
|                     | <b>SSD Group</b> |         |          | 8.4      | .039*              | 0.073 |
|                     | No SSD           | REF     | REF      |          |                    |       |
|                     | Resolved SSD     | -5.2    | 4.9      |          |                    |       |
|                     | Low MSW          | -10.5   | 6.7      |          |                    |       |
|                     | PSD + Low MSW    | -14.0   | 5.9      |          |                    |       |
| Motor Speech Skills | Intercept        | 0.4     | 1.1      |          |                    |       |
|                     | <b>SSD Group</b> |         |          | 44.4     | < .001***          | 0.204 |
|                     | No SSD           | REF     | REF      |          |                    |       |
|                     | Resolved SSD     | -3.3    | 1.3      |          |                    |       |
|                     | Low MSW          | -3.1    | 1.8      |          |                    |       |
|                     | PSD + Low MSW    | -7.5    | 1.5      |          |                    |       |
| Recalling Sentences | Intercept        | 11.22   | 0.68     |          |                    |       |
|                     | <b>SSD Group</b> |         |          | 47.6     | < .001***          | 0.284 |
|                     | No SSD           | REF     | REF      |          |                    |       |
|                     | Resolved SSD     | -1.57   | 0.83     |          |                    |       |
|                     | Low MSW          | -3.80   | 1.17     |          |                    |       |
|                     | PSD + Low MSW    | -5.76   | 0.98     |          |                    |       |

*Note.* REF = reference group;  $\chi^2$  = chi-squared (3 d.f.) statistic from analysis of variance (ANOVA) comparing models with and without outcome group; Overall  $p$  =  $p$  value corresponding to  $\chi^2$ : NS ( $p \geq .1$ ), \* $p < .1$ , \*\* $p < .05$ , \*\*\* $p < .001$ ;  $R^2$  = multiple  $R^2$  for the outcome group only. Neither sex or socioeconomic status were significant covariates and therefore not included in the models. GFTA = Goldman-Fristoe Test of Articulation, Sounds in Words Subtest; PPVT = Peabody Picture Vocabulary Test; EOWPVT-3 = Expressive One Word Picture Vocabulary Test–Third Edition; Motor Speech Skills = Robbins and Klee (1987); Recalling Sentences = from Clinical Evaluation of Language Fundamentals–Preschool (CELF-P) and Test of Language Development–Primary: Third Edition (TOLD-P:3) Preschool Sentence Imitation.

## References

- Dunn, D. M., & Dunn, L. M. (1997). *Peabody Picture Vocabulary Test—III (PPVT-III)*. Circle Pines, MN: AGS.
- Dunn, L. M. (2006). *Peabody Picture Vocabulary Test—Fourth Edition (PPVT-4)*. Circle Pines, MN: AGS.
- Gardner, M. F. (2000). *Expressive One-Word Picture Vocabulary Test—Third Edition (EOWPVT-3)*. Novato, CA: Academic Therapy Publications.
- Goldman, R., & Fristoe, M. (1986). *Goldman-Fristoe Test of Articulation*. Circle Pines, MN: AGS.
- Goldman, R., & Fristoe, M. (2000). *Goldman-Fristoe Test of Articulation—Second Edition*. Circle Pines, MN: AGS.
- Newcomer, P. L., & Hammill, D. D. (1997). *Test of Language Development—Primary: Third Edition (TOLD-P:3)*. Austin, TX: Pro-Ed.
- Robbins, J., & Klee, T. (1987). Clinical assessment of oropharyngeal motor development in young children. *Journal of Speech and Hearing Disorders*, 52, 271–277.
- Wiig, E. H., Secord, W., & Semel, E. (1992). *Clinical Evaluation of Language Fundamentals—Preschool*. San Antonio, TX: The Psychological Corporation.
